# Supplementary material for: Validating a non-invasive, ALT-based non-alcoholic fatty liver phenotype in the million veteran program
Source: PubMed Central journal article supplement (PMC7447043; doi:10.1371/journal.pone.0237430), 2020-08-25

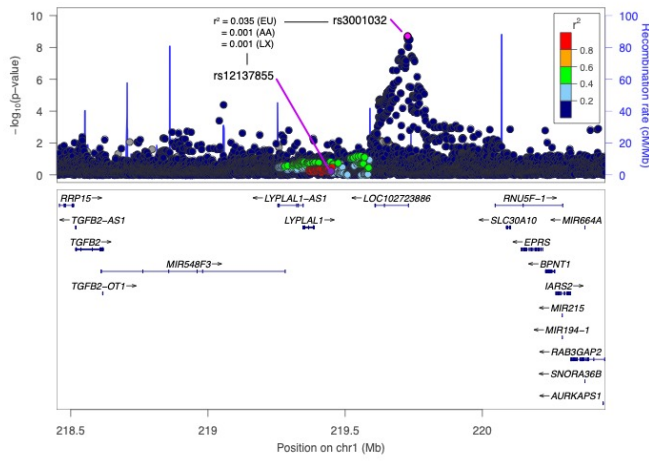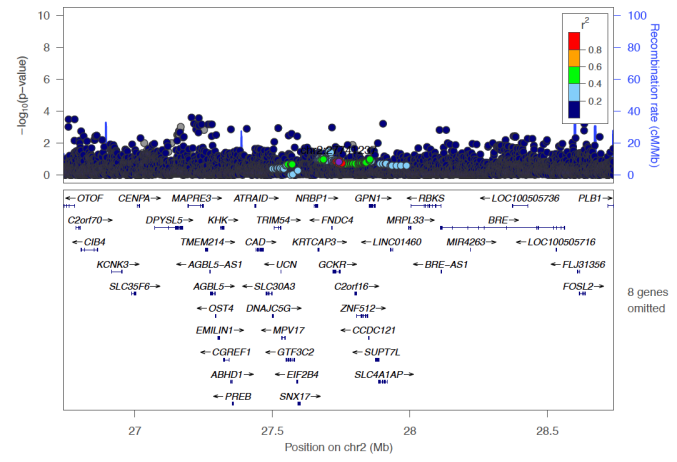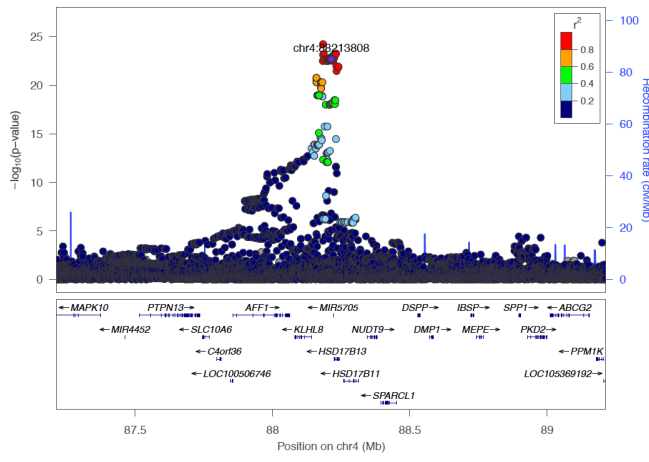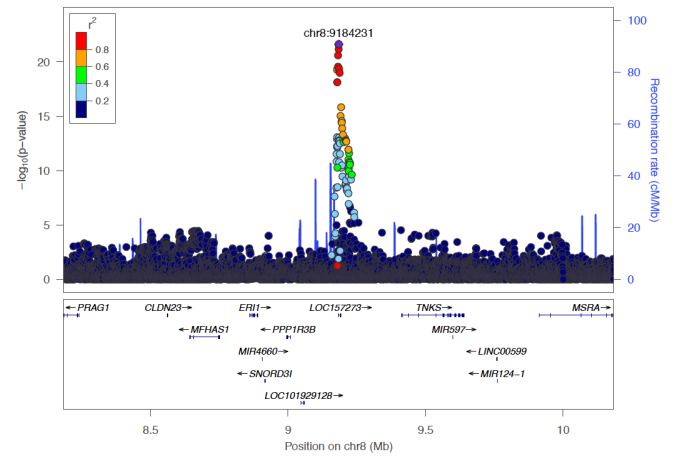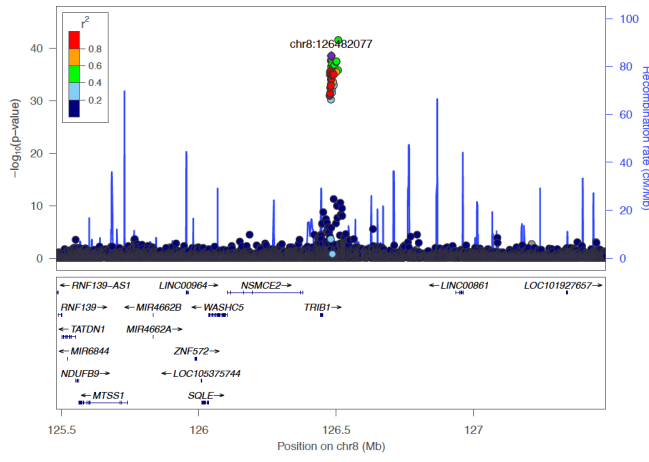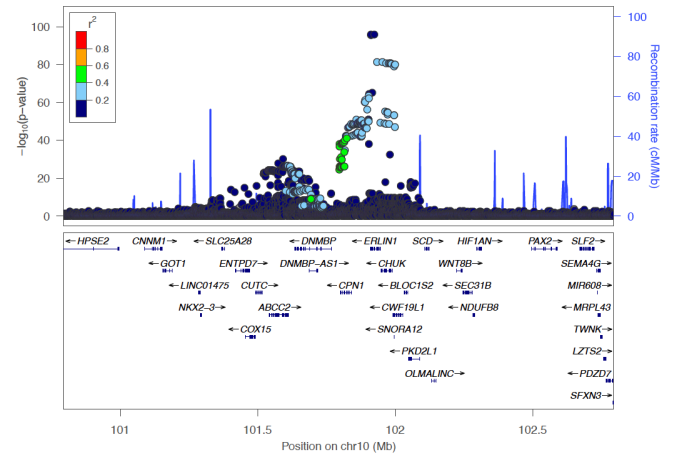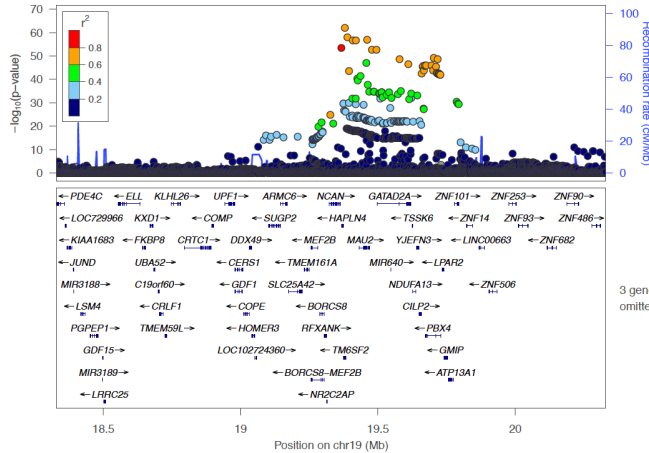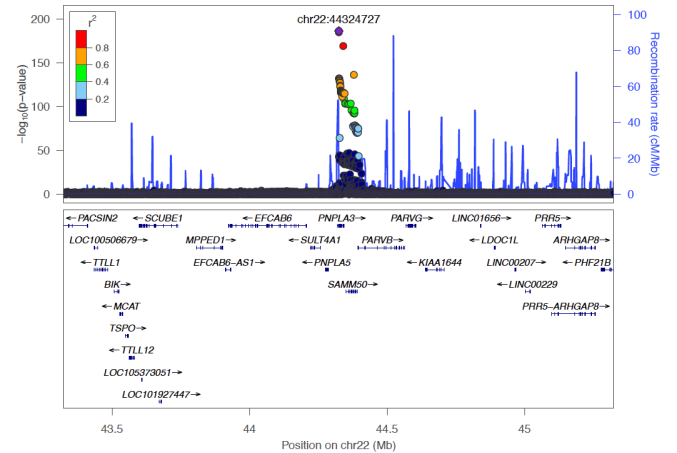

Supplement: pone.0237430.s002.pdf [file pone.0237430.s002.pdf]
